# Supplementary material for: USP36 SUMOylates Las1L and Promotes Its Function in Pre–Ribosomal RNA ITS2 Processing
Source: PubMed Central journal article supplement (PMC11523043; doi:10.1158/2767-9764.crc-24-0312), 2024-10-30
Supplement: crc-24-0312_supplementary_figure_s1_suppsf1.pdf [file crc-24-0312_supplementary_figure_s1_suppsf1.pdf]

## Supplementary Figure S1

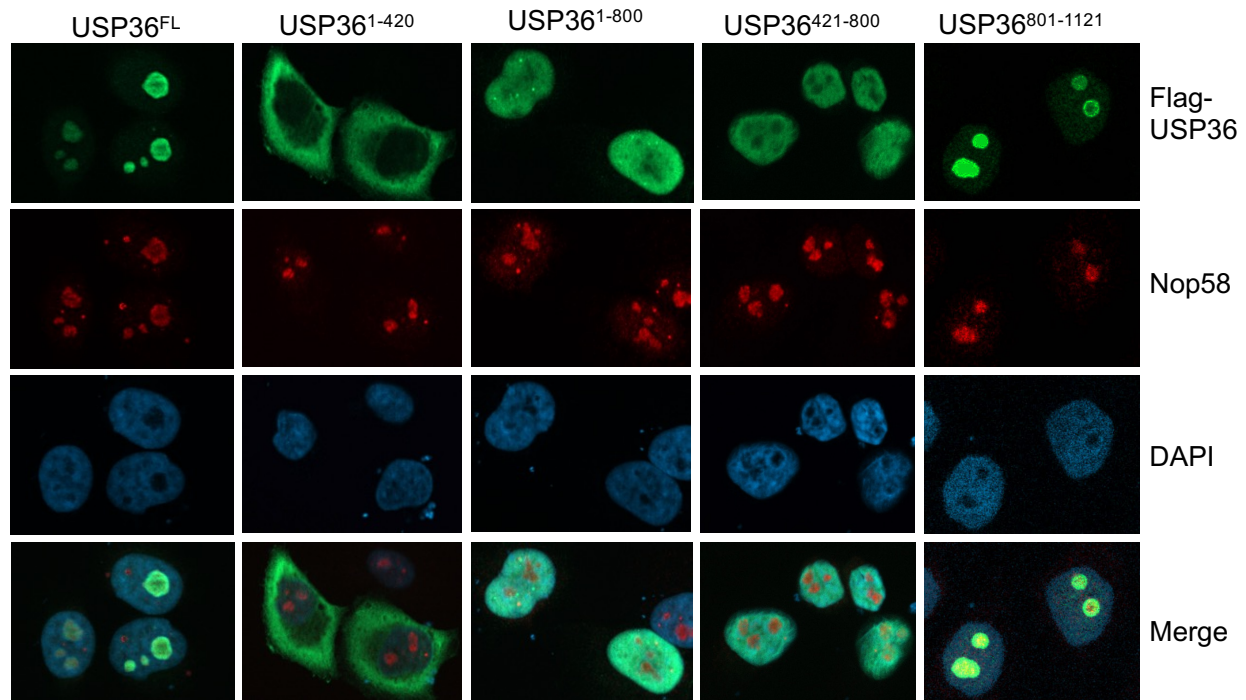

**Supplementary Figure S1. Cellular localization of USP36 and its deletion mutants determined by immunofluorescence staining.** H1299 cells transfected with Flag-tagged full-length (FL) USP36 and its deletion mutants were stained with anti-Flag and anti-Nop58 (a nucleolar marker) antibodies followed by DAPI staining for DNA.
