# Supplementary material for: USP36 SUMOylates Las1L and Promotes Its Function in Pre–Ribosomal RNA ITS2 Processing
Source: PubMed Central journal article supplement (PMC11523043; doi:10.1158/2767-9764.crc-24-0312), 2024-10-30
Supplement: crc-24-0312_supplementary_figure_s2_suppsf2.pdf [file crc-24-0312_supplementary_figure_s2_suppsf2.pdf]

## Supplementary Figure S2

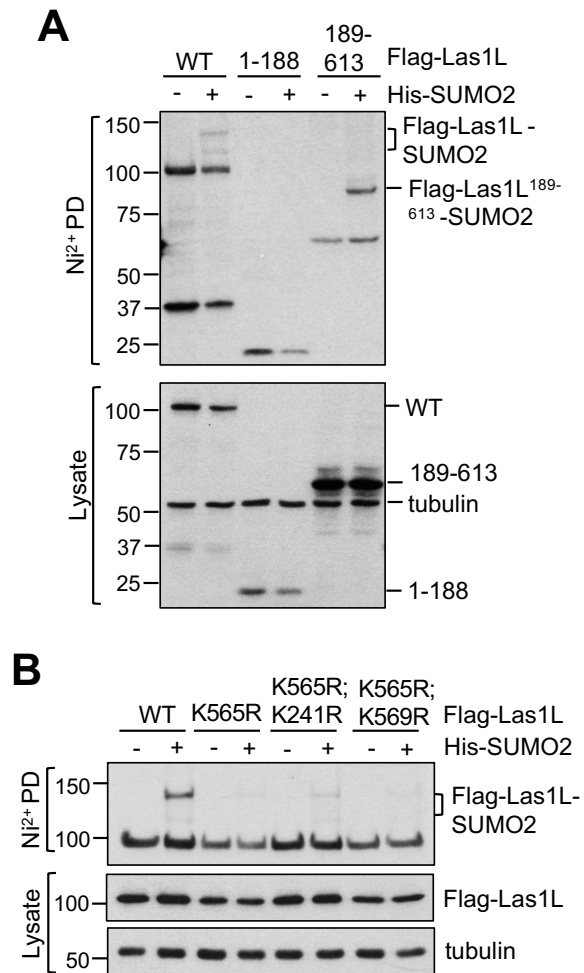

**Supplementary Figure S2. SUMOylation of Las1L. (A)** SUMOylation of Las1L deletion mutants. H1299 cells transfected with WT Las1L or its deletion mutants in the absence or presence of His-SUMO2 were subjected to Ni<sup>2+</sup>-NTA PD followed by IB to detect Las1L SUMOylation. The SUMOylated WT Las1L and its fragment are indicated. The protein expression is shown at the bottom panel. **(B)**. Las1L is SUMOylated at K565. H1299 cells transfected with the indicated plasmids were subjected to Ni<sup>2+</sup>-NTA PD followed by IB to detect Las1L SUMOylation. The SUMOylated Las1L is indicated. The protein expression is shown at the bottom panels.
