# Supplementary material for: USP36 SUMOylates Las1L and Promotes Its Function in Pre–Ribosomal RNA ITS2 Processing
Source: PubMed Central journal article supplement (PMC11523043; doi:10.1158/2767-9764.crc-24-0312), 2024-10-30
Supplement: crc-24-0312_supplementary_figure_s3_suppsf3.pdf [file crc-24-0312_supplementary_figure_s3_suppsf3.pdf]

### Supplementary Figure S3

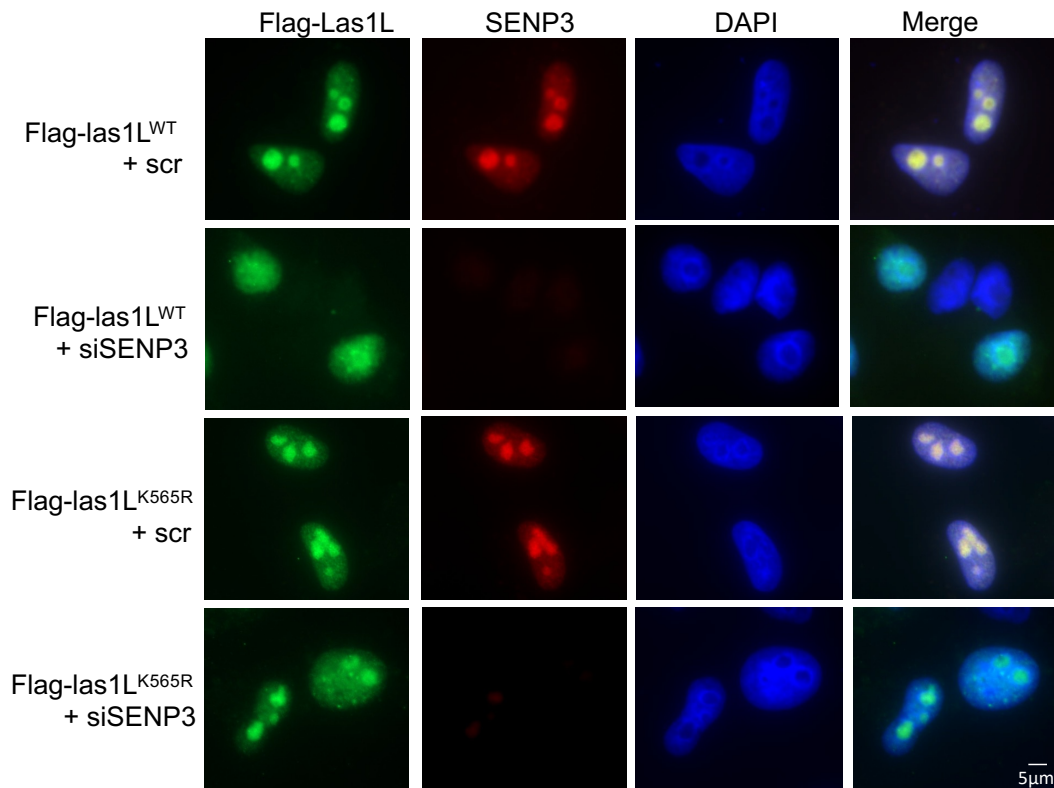

**Supplementary Figure S3. Las1L SUMOylation at K565 affects its nucleoplasmic translocation.** HeLa cells transfected with Flag-Las1L (WT or the K565R mutant) together with scr or SENP3 siRNA were immunostained with anti-Flag (Green) and anti-SENP3 (Red) followed by DAPI staining for DNA (blue).
