# Supplementary material for: USP36 SUMOylates Las1L and Promotes Its Function in Pre–Ribosomal RNA ITS2 Processing
Source: PubMed Central journal article supplement (PMC11523043; doi:10.1158/2767-9764.crc-24-0312), 2024-10-30
Supplement: crc-24-0312_supplementary_figure_s4_suppsf4.pdf [file crc-24-0312_supplementary_figure_s4_suppsf4.pdf]

### Supplementary Figure S4

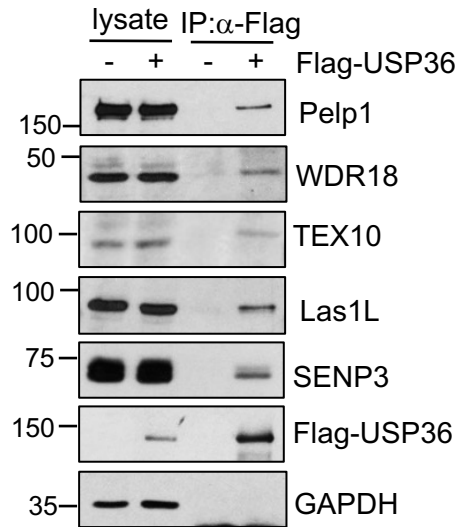

**Supplementary Figure S4. USP36 interacts with rixosome components.** 293 cells transfected with Flag-USP36 or empty vector were immunoprecipitated with anti-Flag antibody followed by IB detection of Pelp1, WDR18, TEX10, Las1L and SENP3.
