# Supplementary material for: USP36 SUMOylates Las1L and Promotes Its Function in Pre–Ribosomal RNA ITS2 Processing
Source: PubMed Central journal article supplement (PMC11523043; doi:10.1158/2767-9764.crc-24-0312), 2024-10-30
Supplement: crc-24-0312_supplementary_table_1_suppst1.pdf [file crc-24-0312_supplementary_table_1_suppst1.pdf]

## Supplementary Table 1: Primers for cloning and mutagenesis

| Name                  | Sequence                            |
|-----------------------|-------------------------------------|
| Las1L_Bgl II_For      | CGGAGATCTTCGTGGGAATCCGGGGCCGGGCCAG  |
| Las1L_EcoRI_Rev       | CCGGAATTCTCAGAAGAGCTGCAGGCCAG       |
| Las1L 613 EcoRI-Rev   | CCGGAATTCTCATGTAGAGAAAGCCCCACCTCC   |
| Las1L 189 Bgl II-For  | CGGAGATCTGAGAACAGCCTGA GAGAGACC     |
| Las1L 188 EcoRI_Rev   | CCGGAATTCTCACAGTTGGCGGCACCAATAGG    |
| Nol9_EcoRI_For        | CGGGAATTCTGGCGGACTCGGGACTGCTGCTAAAG |
| Nol9_XbaI_Rev         | CGGTCTAGATCACTTCATTTTTCGACAGAAC     |
| Nol9 479 XbaI-Rev     | CGGTCTAGATCATTCCAAGCATCTGCAAATGC    |
| Nol9 301 EcoRI-For    | CCGGAATTCTATGTCATTCTAGTTTTGTGGATCC  |
| Nol9 300 XbaI-Rev     | CGGTCTAGATCAAGGGCAGCCATCTACTTCTTC   |
| Las1L K565R-For       | AGTGTTAATGATGTCAGGGAAGAGGAGAAGGAG   |
| Las1L K565R-Rev       | CTCCTTCTCCTCTTCCCTGACATCATTAACTG    |
| Las1L K226R-For       | GACATCACAGAACAGAGACCAGAGCCTCAGGATG  |
| Las1L K226R-Rev       | ATCCTGAGGCTCTGGTCTCTGTTCTGTGATGTC   |
| Las1L_K241R-For       | ACGGAGTCAGATGTAAGGGCCGATGGAGACAGC   |
| Las1L_K241R-Rev       | GCTGTCTCCATCGGCCCTTACATCTGACTCCGT   |
| Las1L_K565R_K569R-For | TGTCAGGGAAGAGGAGAGGGAGGAGAAAGAGGTC  |
| Las1L_K565R_K569R-Rev | GACCTCTTCTCCTCCCTCTCCTCTTCCCTGACA   |
